# Supplementary material for: A chimeric nuclease substitutes a phage CRISPR-Cas system to provide sequence-specific immunity against subviral parasites
Source: eLife journal article supplement (doi:10.7554/elife.68339), 2021-07-07

Figure 4- figure supplement 2- source data 1

Figure 4- figure supplement 2A

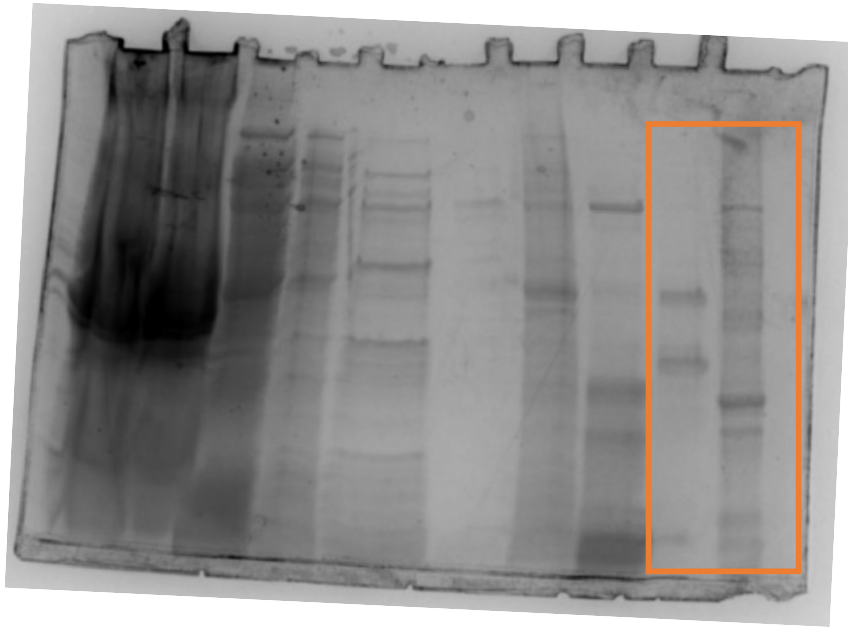

Figure 4- figure supplement 2B

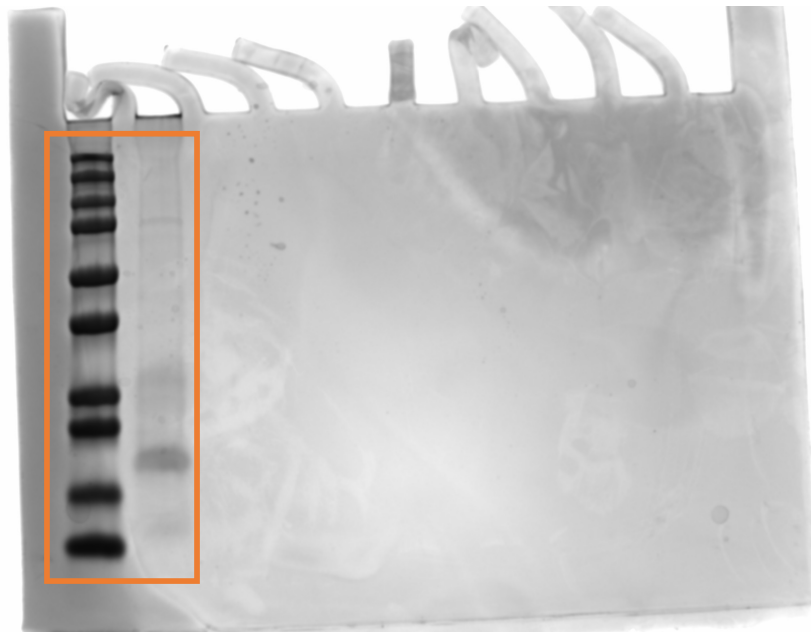

Figure 4- figure supplement 2C

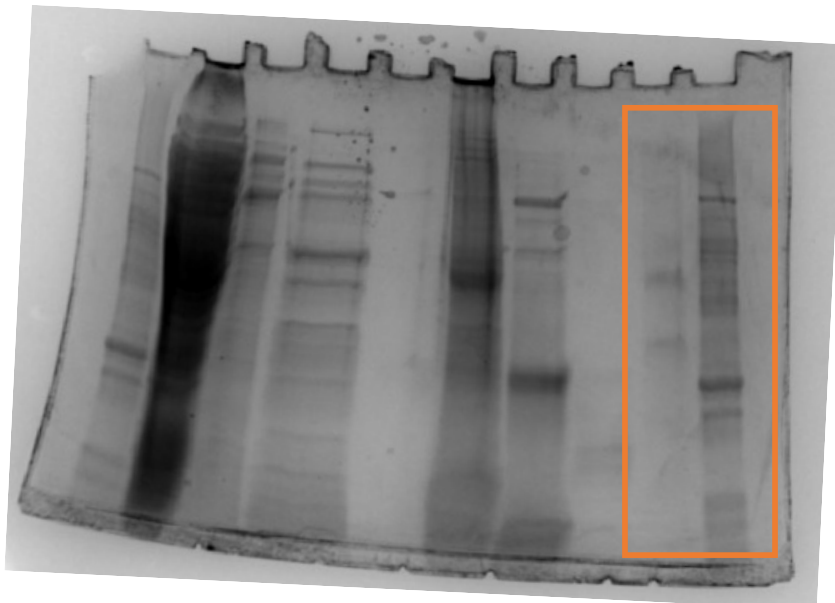

Supplement: fig4-figsupp2-data1 [file elife-68339-fig4-figsupp2-data1-v1.pdf]
