# Supplementary material for: A chimeric nuclease substitutes a phage CRISPR-Cas system to provide sequence-specific immunity against subviral parasites
Source: eLife journal article supplement (doi:10.7554/elife.68339), 2021-07-07

Figure 5- figure supplement 1- source data 1

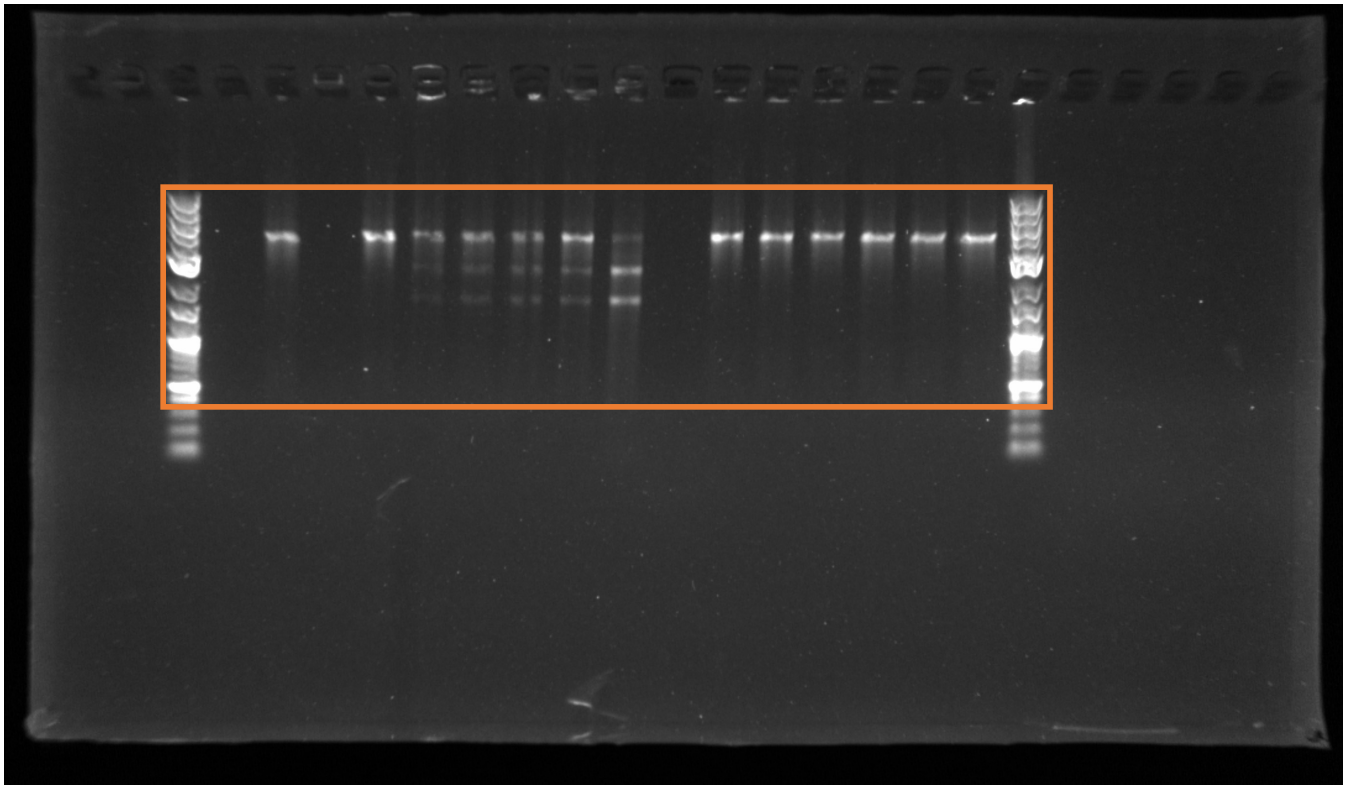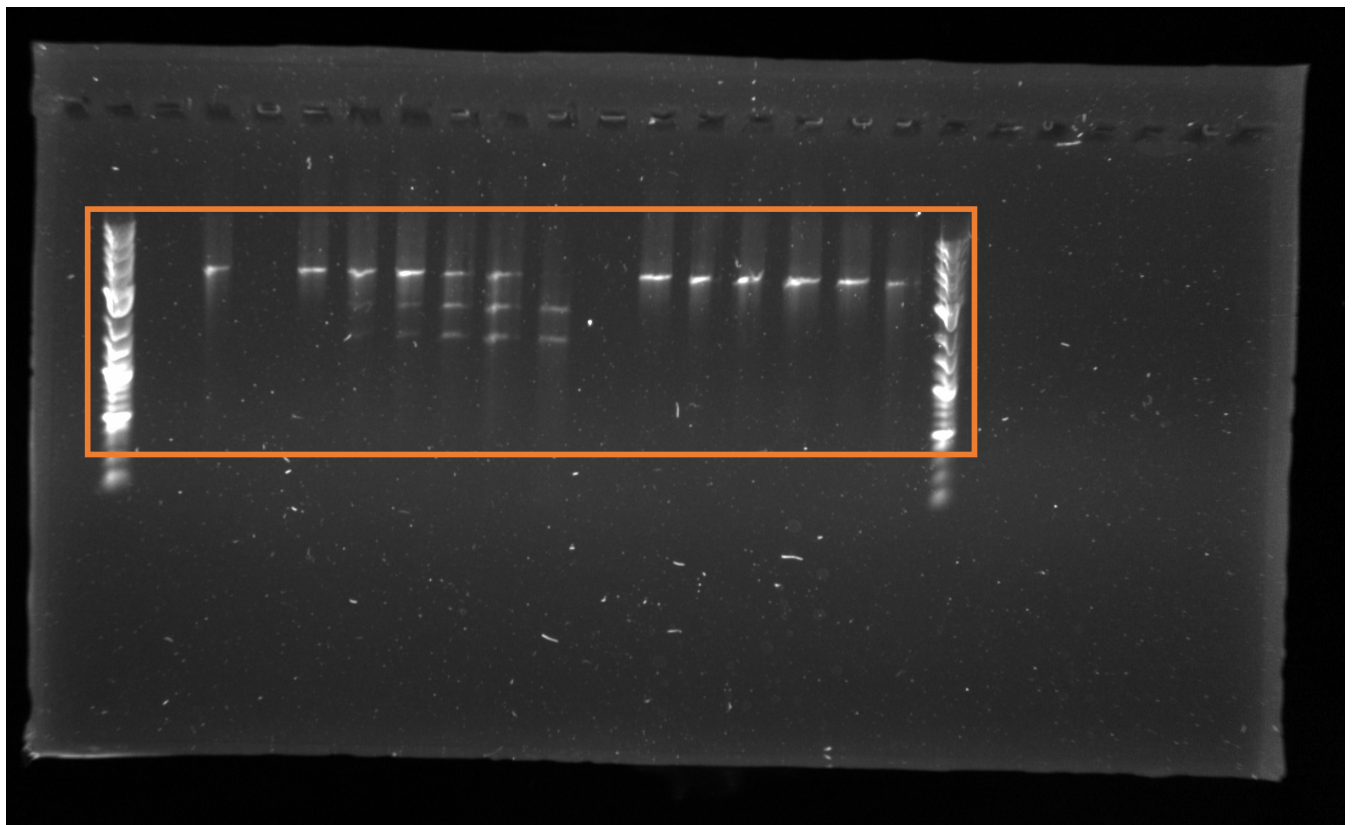

Supplement: fig5-figsupp1-data1 [file elife-68339-fig5-figsupp1-data1-v1.pdf]
