# Supplementary material for: A chimeric nuclease substitutes a phage CRISPR-Cas system to provide sequence-specific immunity against subviral parasites
Source: eLife. 2021 Jul 7;10:e68339. doi: 10.7554/eLife.68339 (PMC8263062; doi:10.7554/eLife.68339)
Supplement: Figure 2—source data 1. [file elife-68339-fig2-data1.xlsx]

## Sheet: Figure 2B
PLE1 + WT ICP1	PLE1 + ∆gp88	PLE1 + gp88 * ICP1	PLE + WT ICP1	PLE2 + ∆gp88	PLE2 + gp88 * ICP1
0.195747	730.106	436.532	442.886	419.035	408.756
0.116477	587.975	449.918	487.665	613.965	563.99
0.116101	603.286	530.284	457.474	529.918	431.89
