# Supplementary material for: A chimeric nuclease substitutes a phage CRISPR-Cas system to provide sequence-specific immunity against subviral parasites
Source: eLife. 2021 Jul 7;10:e68339. doi: 10.7554/eLife.68339 (PMC8263062; doi:10.7554/eLife.68339)
Supplement: Figure 3—figure supplement 2—source data 1. [file elife-68339-fig3-figsupp2-data1.xlsx]

## Sheet: Figure 3S2
PLE2 WT	PLE2 ∆ori	PLE2 ∆repA
367.997	1.64404	1.50405
697.377	1.42473	1.1754
483.302	1.44608	1.32536
