# Supplementary material for: A chimeric nuclease substitutes a phage CRISPR-Cas system to provide sequence-specific immunity against subviral parasites
Source: eLife. 2021 Jul 7;10:e68339. doi: 10.7554/eLife.68339 (PMC8263062; doi:10.7554/eLife.68339)
Supplement: Figure 3—source data 1. [file elife-68339-fig3-data1.xlsx]

## Sheet: Figure 3B
PLE1::ori2 RepA1	PLE1::ori2 RepA2	PLE2::ori1 RepA1	PLE2::ori1 RepA2
1.05814	383.55	843.45	1.43195
1.05841	409.988	781.554	1.38025
1.12207	405.015	810.219	2.49219
