# Supplementary material for: A chimeric nuclease substitutes a phage CRISPR-Cas system to provide sequence-specific immunity against subviral parasites
Source: eLife. 2021 Jul 7;10:e68339. doi: 10.7554/eLife.68339 (PMC8263062; doi:10.7554/eLife.68339)
Supplement: Figure 6—source data 2. [file elife-68339-fig6-data2.xlsx]

## Sheet: Figure 6D
PLE1 + WT ICP1	PLE1 + ∆gp88	PLE1MUT + WT ICP1	PLE1MUT + ∆gp88
0.576891	602.789	978.488	904.097
0.50094	678.325	894.769	989.58
0.669794	694.834	1096.85	1082.78
0.665851	939.694	598.003	612.228
0.831905	571.51	355.893	302.385
0.436728	976.467	605.27	791.844
